# Supplementary material for: Unveiling hot carrier relaxation and carrier transport mechanisms in quasi-two-dimensional layered perovskites
Source: Royal Society of Chemistry journal article supplement (doi:10.1039/d0ta09530c), 2020-01-01
Supplement: d0ta09530c1.pdf [file d0ta09530c1.pdf]

**Supplementary Information:**

**Unveiling hot carrier relaxation and carrier transport mechanisms in  
quasi-two-dimensional layered perovskites**

*Dabin Lin,<sup>a</sup> Lin Ma,<sup>\*a</sup> Wenjun Ni,<sup>b</sup> Cheng Wang,<sup>a</sup> Fangteng Zhang,<sup>a</sup> Huafeng Dong,<sup>a</sup> Gagik  
G. Gurzadyan<sup>b</sup> and Zhaogang Nie<sup>\*a</sup>*

<sup>a</sup>School of Physics and Optoelectronic Engineering, Guangdong University of Technology,  
Guangzhou 510006, China.

<sup>b</sup>State Key Laboratory of Fine Chemicals, Institute of Artificial Photosynthesis, Dalian  
University of Technology, Dalian 116024, China.

E-mail: malin@gdut.edu.cn; zgnie@gdut.edu.cn

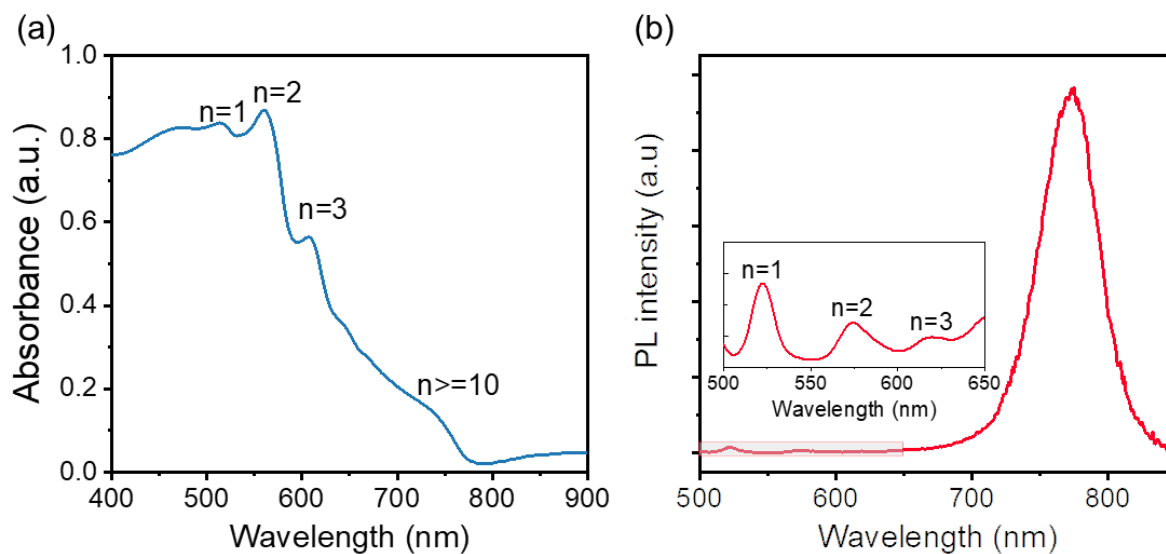

**Figure S1.** Steady-state (a) absorption and (b) photoluminescence (PL) spectra of  $(\text{PEA})_2(\text{MA})_2\text{Pb}_3\text{I}_{10}$  2D layered perovskite film. The PL is excited from the glass substrate side under excitation at 460 nm.

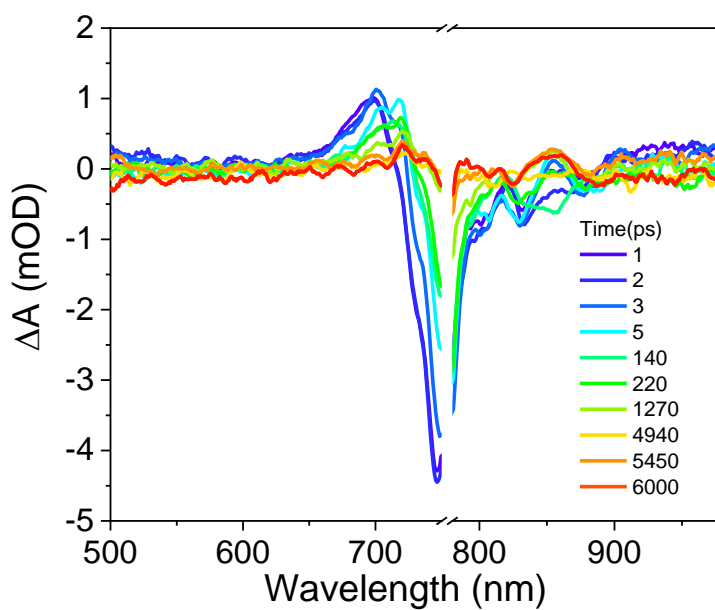

**Figure S2.** Transient absorption spectra of  $(\text{PEA})_2(\text{MA})_2\text{Pb}_3\text{I}_{10}$  excited from the front face (air side) under 770 nm excitation (The scattering signal due to excitation light is removed for clarity).

**Table S1.** Fitting parameters of TA kinetics under various excitation wavelengths.

| $\lambda_{\text{exc}}$ | $\lambda_{\text{probe}}$ | $\tau_0$ , ps       | A <sub>0</sub> | $\tau_1$ , ps    | A <sub>1</sub> | $\tau_2$ , ps   | A <sub>2</sub> | $\tau_3$ , ps       | A <sub>3</sub> |
|------------------------|--------------------------|---------------------|----------------|------------------|----------------|-----------------|----------------|---------------------|----------------|
| 400 nm                 | 525 nm<br>(n=1)          | 0.22<br>$\pm 0.04$  | 54%            | 2.0<br>$\pm 1$   | 23%            | 11<br>$\pm 4$   | 23%            | --                  | --             |
|                        | 573 nm<br>(n=2)          | 0.40<br>$\pm 0.01$  | 25%            | 9.0<br>$\pm 0.3$ | 35%            | 100<br>$\pm 4$  | 29%            | 2600<br>$\pm 200$   | 11%            |
|                        | 617 nm<br>(n=3)          | 0.20<br>$\pm 0.002$ | -100%          | 13<br>$\pm 0.6$  | 39%            | 107<br>$\pm 9$  | 39%            | 850<br>$\pm 90$     | 22%            |
|                        | 760 nm<br>(n $\geq 10$ ) | 0.53<br>$\pm 0.08$  | -100%          | 9.0<br>$\pm 0.8$ | -23%           | 280<br>$\pm 30$ | 38%            | 2100<br>$\pm 200$   | 62%            |
| 530 nm                 | 573 nm<br>(n=2)          | 0.32<br>$\pm 0.08$  | 15%            | 9.7<br>$\pm 0.8$ | 50%            | 130<br>$\pm 20$ | 35%            | --                  | --             |
|                        | 617 nm<br>(n=3)          | 0.56<br>$\pm 0.03$  | 26%            | 20<br>$\pm 1$    | 36%            | 280<br>$\pm 20$ | 38%            | --                  | --             |
|                        | 760 nm<br>(n $\geq 10$ ) | 0.46<br>$\pm 0.01$  | -100%          | 17<br>$\pm 3$    | -20%           | --              | --             | 1000<br>$\pm 200$   | 38%            |
| 570 nm                 | 573 nm<br>(n=2)          | 0.38<br>$\pm 0.04$  | -12%           | 4.8<br>$\pm 0.3$ | 32%            | 46<br>$\pm 2$   | 50%            | 590<br>$\pm 50$     | 18%            |
|                        | 617 nm<br>(n=3)          | 0.26<br>$\pm 0.08$  | 34%            | 4.5<br>$\pm 0.3$ | 17%            | 52<br>$\pm 2$   | 33%            | 650<br>$\pm 40$     | 16%            |
|                        | 760 nm<br>(n $\geq 10$ ) | 0.41<br>$\pm 0.01$  | -89%           | 5.1<br>$\pm 0.8$ | -11%           | 260<br>$\pm 10$ | 55%            | 4200<br>$\pm 200$   | 45%            |
| 610 nm                 | 573 nm<br>(n=2)          | 0.06<br>$\pm 0.01$  | -100%          | --               | --             | 230<br>$\pm 20$ | 100%           | --                  | --             |
|                        | 617 nm<br>(n=3)          | 0.30<br>$\pm 0.02$  | 30%            | 5.9<br>$\pm 0.3$ | 31%            | 97<br>$\pm 6$   | 31%            | 4000<br>$\pm 800$   | 8%             |
|                        | 760 nm<br>(n $\geq 10$ ) | --                  | --             | 2.0<br>$\pm 0.8$ | -80%           | --              | --             | 15000<br>$\pm 1000$ | 100%           |

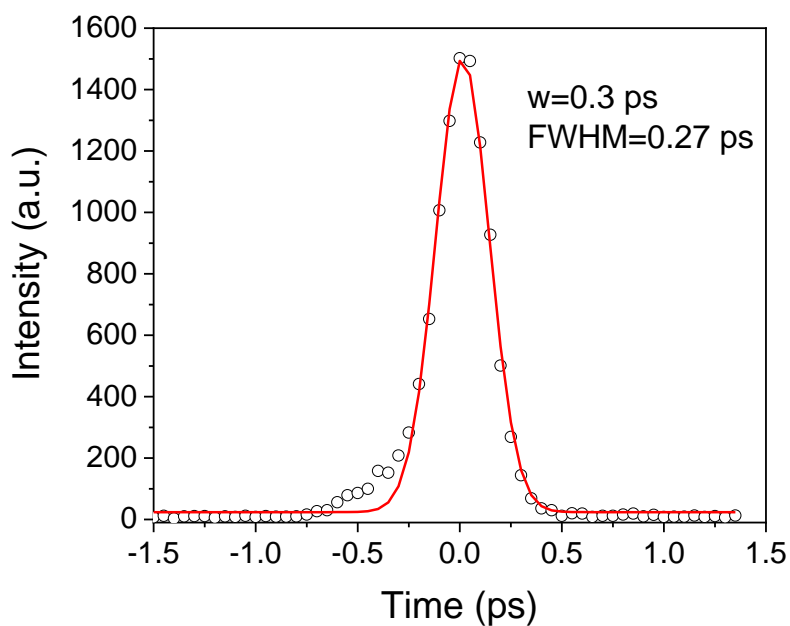

**Figure S3.** Instrument response function (IRF) of fluorescence up-conversion setup determined from the Gaussian fit of Raman scattering signal in ethanol solvent.

**Table S2.** Fitting parameters of time-resolve PL kinetics at different emission wavelengths measured via femtosecond fluorescence up-conversion under 400 nm excitation.

| $\lambda_{\text{PL}}$    | $\tau_0$ , ps         | $A_0$ | $\tau_1$ , ps    | $A_1$ | $\tau_2$ , ps  | $A_2$ | $\tau_3$ , ps    | $A_3$ | $\tau_4$ , ps  | $A_4$ |
|--------------------------|-----------------------|-------|------------------|-------|----------------|-------|------------------|-------|----------------|-------|
| 522 nm<br>(n=1)          | 0.39<br>$\pm$<br>0.05 | -100% | 2.5<br>$\pm 0.4$ | 73%   | 18<br>$\pm 3$  | 27%   | --               | --    | --             | --    |
| 573 nm<br>(n=2)          | 0.22<br>$\pm 0.04$    | -100% | 3.0<br>$\pm 0.4$ | 57%   | 31<br>$\pm 8$  | 31%   | 250<br>$\pm 100$ | 12%   | --             | --    |
| 620 nm<br>(n=3)          | 0.23<br>$\pm 0.06$    | -100% | 3.5<br>$\pm 0.7$ | 53%   | 47<br>$\pm 17$ | 30%   | 370<br>$\pm 160$ | 31%   | --             | --    |
| 720 nm<br>(n $\geq 10$ ) | IRF                   | -16%  | 2.4<br>$\pm 0.8$ | -35%  | --             | --    | 250<br>$\pm 60$  | -49%  | 25000<br>fixed | 100%  |

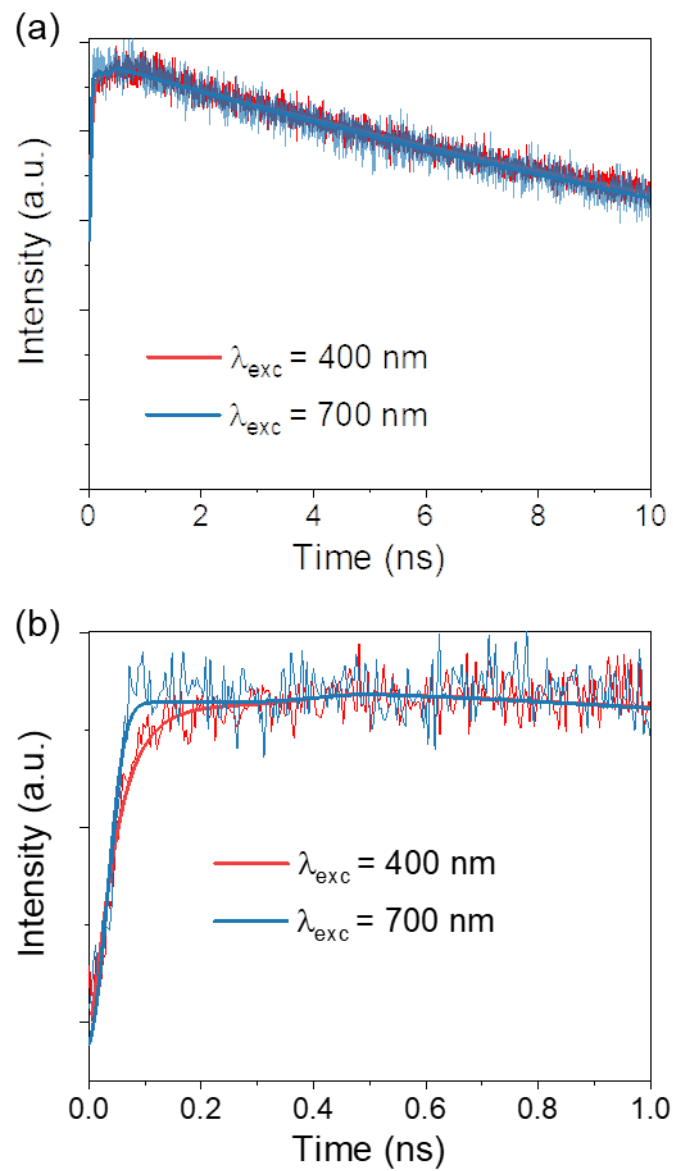

**Figure S4.** Time-resolved PL kinetics of  $(\text{PEA})_2(\text{MA})_2\text{Pb}_3\text{I}_{10}$  at ns scale at 750 nm measured by time correlated singlet photon counting (TCSPC) technique under excitation at 400 nm (red) and 700 nm (blue).
